# Phylogenetic Analysis of the Complete Mitochondrial Genome of *Madurella mycetomatis* Confirms Its Taxonomic Position within the Order Sordariales

Wendy W. J. van de Sande\*

Department of Medical Microbiology and Infectious Diseases, Erasmus MC, Rotterdam, The Netherlands

## Abstract

**Background:** *Madurella mycetomatis* is the most common cause of human eumycetoma. The genus *Madurella* has been characterized by overall sterility on mycological media. Due to this sterility and the absence of other reliable morphological and ultrastructural characters, the taxonomic classification of *Madurella* has long been a challenge. Mitochondria are of monophyletic origin and mitochondrial genomes have been proven to be useful in phylogenetic analyses.

**Results:** The first complete mitochondrial DNA genome of a mycetoma-causative agent was sequenced using 454 sequencing. The mitochondrial genome of *M. mycetomatis* is a circular DNA molecule with a size of 45,590 bp, encoding for the small and the large subunit rRNAs, 27 tRNAs, 11 genes encoding subunits of respiratory chain complexes, 2 ATP synthase subunits, 5 hypothetical proteins, 6 intronic proteins including the ribosomal protein *rps3*. In phylogenetic analyses using amino acid sequences of the proteins involved in respiratory chain complexes and the 2 ATP synthases it appeared that *M. mycetomatis* clustered together with members of the order Sordariales and that it was most closely related to *Chaetomium thermophilum*. Analyses of the gene order showed that within the order Sordariales a similar gene order is found. Furthermore also the tRNA order seemed mostly conserved.

**Conclusion:** Phylogenetic analyses of fungal mitochondrial genomes confirmed that *M. mycetomatis* belongs to the order of Sordariales and that it was most closely related to *Chaetomium thermophilum*, with which it also shared a comparable gene and tRNA order.

**Citation:** van de Sande WWJ (2012) Phylogenetic Analysis of the Complete Mitochondrial Genome of *Madurella mycetomatis* Confirms Its Taxonomic Position within the Order Sordariales. PLoS ONE 7(6): e38654. doi:10.1371/journal.pone.0038654

**Editor:** Vishnu Chaturvedi, New York State Health Department and University at Albany, United States of America

**Received:** February 9, 2012; **Accepted:** May 8, 2012; **Published:** June 6, 2012

**Copyright:** © 2012 Wendy W. J. van de Sande. This is an open-access article distributed under the terms of the Creative Commons Attribution License, which permits unrestricted use, distribution, and reproduction in any medium, provided the original author and source are credited.

**Funding:** This research was financially supported by VENI grant 91611178 of the Netherlands Organisation of Scientific Research (NWO). The funders had no role in study design, data collection and analysis, decision to publish, or preparation of the manuscript.

**Competing Interests:** The author has declared that no competing interests exist.

\* E-mail: w.vandesande@erasmusmc.nl

## Introduction

*Madurella mycetomatis* is the most common causative agent of human mycetoma, a chronic inflammatory disease, which remains localized and involves subcutaneous tissues, fascia and bones [1]. The disease is characterised by tumefaction, discharging sinuses and the presence of fungal grains [1]. The generic criteria for *Madurella* are primarily based on tissue morphology and overall sterility on mycological media, as well as an invasive potential in human and animal hosts [2]. Since no sexual stage of *M. mycetomatis* has been discovered, the taxonomic classification of *Madurella* has long been a challenge. Especially, since there are also no asexual conidia produced nor other morphological and ultrastructural characters which could be of aid in the taxonomic classification. With the development of molecular typing tools, such as sequencing of the nuclear sequences encoding for the internal transcribed spacer (ITS), the beta-tubulin gene and the ribosomal binding protein it became possible to establish the taxonomic place of *Madurella* among the ascomycetes [3,4]. Based on these nuclear sequence data, it appeared that the genus *Madurella*, consisting of five species *M. mycetomatis*, *M. grisea*, *M. pseudomycetomatis*, *M. fahalii* and *M. tropicana*, could be taxonomically

differentiated into two different orders, namely the orders Sordariales and Pleosporales [3,4]. The generic type species *M. mycetomatis* belonged to the order of Sordariales together with *M. pseudomycetomatis*, *M. fahalii* and *M. tropicana*, and the genus *Madurella* appeared to be closely related to the genus *Chaetomium* [3,4].

Next to nuclear sequences it is also possible to use mitochondrial sequences for phylogenetic analyses. Mitochondria are considered descendants of an endosymbiotic  $\alpha$ -proteobacterium that was engulfed by a eukaryotic or archeobacteria-like cell more than one billion years ago [5]. The current mitochondrial data points to a single origin of mitochondria with no transfer of mitochondria between different eukaryotes [6]. The mitochondrial DNA present in all mitochondria examined to date is believed to be a remnant of the original endosymbiont's DNA, with the number of genes contained greatly reduced [5]. In filamentous fungi, the mitochondria are uniparental inherited and their genomes evolve faster than the corresponding nuclear DNA of the fungus [7,8,9]. Fungal mitochondrial genomes encode 5 to 100 genes, with a typical fungal mitochondrial core genome containing 14 conserved protein-coding genes, 2 rRNA genes and a variable number of

tRNAs [5,10]. MtDNA divergence between different fungal species is predominantly associated with variation in intergenic regions, intronic sequences and gene order, but the core protein-coding genes are conserved [11]. These core conserved protein-coding genes are convincing tools for phylogenetic analysis as they provide not only a large gene-set for which the sequences can be compared directly, but also the opportunity to compare the position of these genes [11]. With the development of novel sequence methods, the number of mitochondrial genomes of fungi has been expanded in the recent past [10,11,12,13,14,15]. This gives us an opportunity to study the phylogeny of fungi using not only nuclear DNA but also mitochondrial DNA. Here we present the mitochondrial genome sequence of *M. mycetomatis*. Its gene order and amino-acid sequences are used in phylogenetic analyses to determine the place of *M. mycetomatis* in the fungal kingdom.

## Materials and Methods

### Isolate

*M. mycetomatis* strain mm55, isolated from the lesion of a 22-year-old patient seen in the Mycetoma Research Centre, University of Khartoum, Sudan, was used in this study. Written informed consent was obtained from this patient and ethical clearance was obtained from Soba University Hospital Ethical Committee. This strain was isolated by direct culture of the black grains obtained by a deep biopsy and identified by morphology, PCR-RFLP and sequencing of the ITS region [16]. This strain is used in the only mouse model of eumycetoma in use today and considered the type strain in phylogenetic and antifungal susceptibility testing as well [17,18,19,20]. The strain was maintained on Sabouraud Dextrose Agar (Difco Laboratories, Paris, France) at 37°C. Passage to fresh medium was done on a monthly basis.

### DNA Extraction

Three-week-old *Madurella* cultures were scraped from Sabouraud agarplates, frozen in liquid nitrogen and ground with a mortar and pestle. DNA was extracted from the resulting pulp with the Promega Wizard Kit (Promega). To the grind mycelia, 300 µl lysis solution was added and mixed by pipetting gently. From this step onwards, the yeast protocol from the Promega Wizard Kit was used according to the manufacturer's instructions.

### Sequencing and Assembling of the Mitochondrial Genome

The genome of *M. mycetomatis* was sequenced using Roche GS junior titanium 454 sequencing according to the manufacturer's instructions. In short DNA was fragmented by nebulisation to an average fragment length of 600–900 bp after which the fragments were amplified and coupled to capture beads using the emPCR amplification kit Lib-L for the GS Junior Titanium Series (Roche). In total  $5 \times 10^6$  coupled beads were deposited on the GS junior titanium picotiterplates (Roche) and sequenced. To assemble the mitochondrial genome the GS de novo assembler of Roche was used. The two ends of the assembled sequence were amplified with primers mmmifow (5'-TCATGGCTTAGATGTTGTGG-3') and mmmitorv (5'-GAGCTATAGTGGCTCCTAGT-3') and resequenced by sanger sequencing to confirm the circular nature of the mitochondrial genome.

### Annotation of the Mitochondrial Genome

Open reading frames (ORFs) were searched with CLC sequence viewer version 6.5.1 (CLC bio, Aarhus, Denmark) and annotated manually using the published mitochondrial genomes of

*Podospora anserina*, *Sordaria macrospora* and *Neurospora crassa*. For hypothetical proteins a cut off of 100 amino acids was used. Codon usage was determined by using the Sequence Manipulation Suite version 2 (www.bioinformatics.org/sms2/codon\_usage.html). tRNAs were identified by using tRNAscan-SE 1.21 [21,22], ARAGORN v1.2 [23], ARWEN [24] and RNAscan [25] software programs. A tRNA was determined to be a true tRNA if it was found with at least 2 out of 4 software programs.

### Phylogenetic Analysis

To compare the *M. mycetomatis* mitochondrial genome with the genome of other fungal mitochondrial genomes, the amino-acid sequences of the protein-encoding genes *atp6*, *atp8*, *atp9*, *cob*, *cox1*, *cox2*, *cox3*, *nad1*, *nad2*, *nad3*, *nad4*, *nad4L*, *nad5* and *nad6* were aligned by clustalW using the Mega 5.05 software package [26]. The sequences of the selected proteins were extracted from the fungal mitochondrial genomes deposited in the GenBank database. The aligned amino-acid sequences were used to construct a maximum likelihood tree with 1000 bootstrap replicates based on the cpREV model using Mega 5.05 [26].

### Genbank Accession Number

The mtDNA sequence of *M. mycetomatis* strain mm55 was deposited in GenBank under accession number JQ015302.

## Results and Discussion

### Genome Organization

The mitochondrial genome of *M. mycetomatis* is a typical circular DNA molecule with a length of 45,590 bp. This mitochondrial genome size is small in comparison with the published mitochondrial genomes belonging to the order of the Sordariales. These genomes range from 64,840 nt (*Neurospora crassa* as stated by the Broad Institute) to 127,206 nt (*Chaetomium thermophilum*) [14,27,28,29]. This difference in genome size is due to the variation in intergenic regions and the presence of hypothetical proteins. In overall, the mitochondrial genome of *M. mycetomatis* is highly compact, with 80% of the genome encoding for structural genes. The genome encodes for the small and the large subunit rRNAs, 27 tRNAs, 11 genes encoding subunits of respiratory chain complexes, 2 ATP synthase subunits, 5 hypothetical proteins and 6 intronic proteins including the ribosomal protein *rps3* (Figure 1, table 1). All genes and tRNAs are found on the plus-strand of the mitochondrial genome, as was also found for mitochondria of most other ascomycetes although for some ascomycetes such as *Mycosphaerella graminicola* genes were located both strands of the mitochondrial genome. [11,13,14,27,30,31]. The *M. mycetomatis* mitochondrial genome is AT-rich, with an overall G+C content of only 26.8%. The regions of the encoding RNA genes, have a slightly higher G+C content, namely 28.8%. This is in agreement with values found for other fungal mitochondria [10].

### Protein Coding Genes

The *M. mycetomatis* mitochondrial genome has the following genes encoding proteins involved in respiratory chain complexes: ATP synthase subunits 6 and 8 (*atp6* and *atp8*), but not for subunit 9, apocytochrome b (*cob*), the cytochrome c oxidase subunits 1, 2, and 3 (*cox1*, *cox2* and *cox3*) and NADH dehydrogenase subunits 1, 2, 3, 4, 4 L, 5, and 6 (*nad1*, *nad2*, *nad3*, *nad4L*, *nad5* and *nad6*) (table 1). Most of these proteins are highly conserved within fungal mitochondrial genomes [13,27,30], only for the *nad* genes and *atp9* some variation is noted. No *nad* genes are present in most of the yeasts and in some fungi *atp9* is located in the nuclear genome or

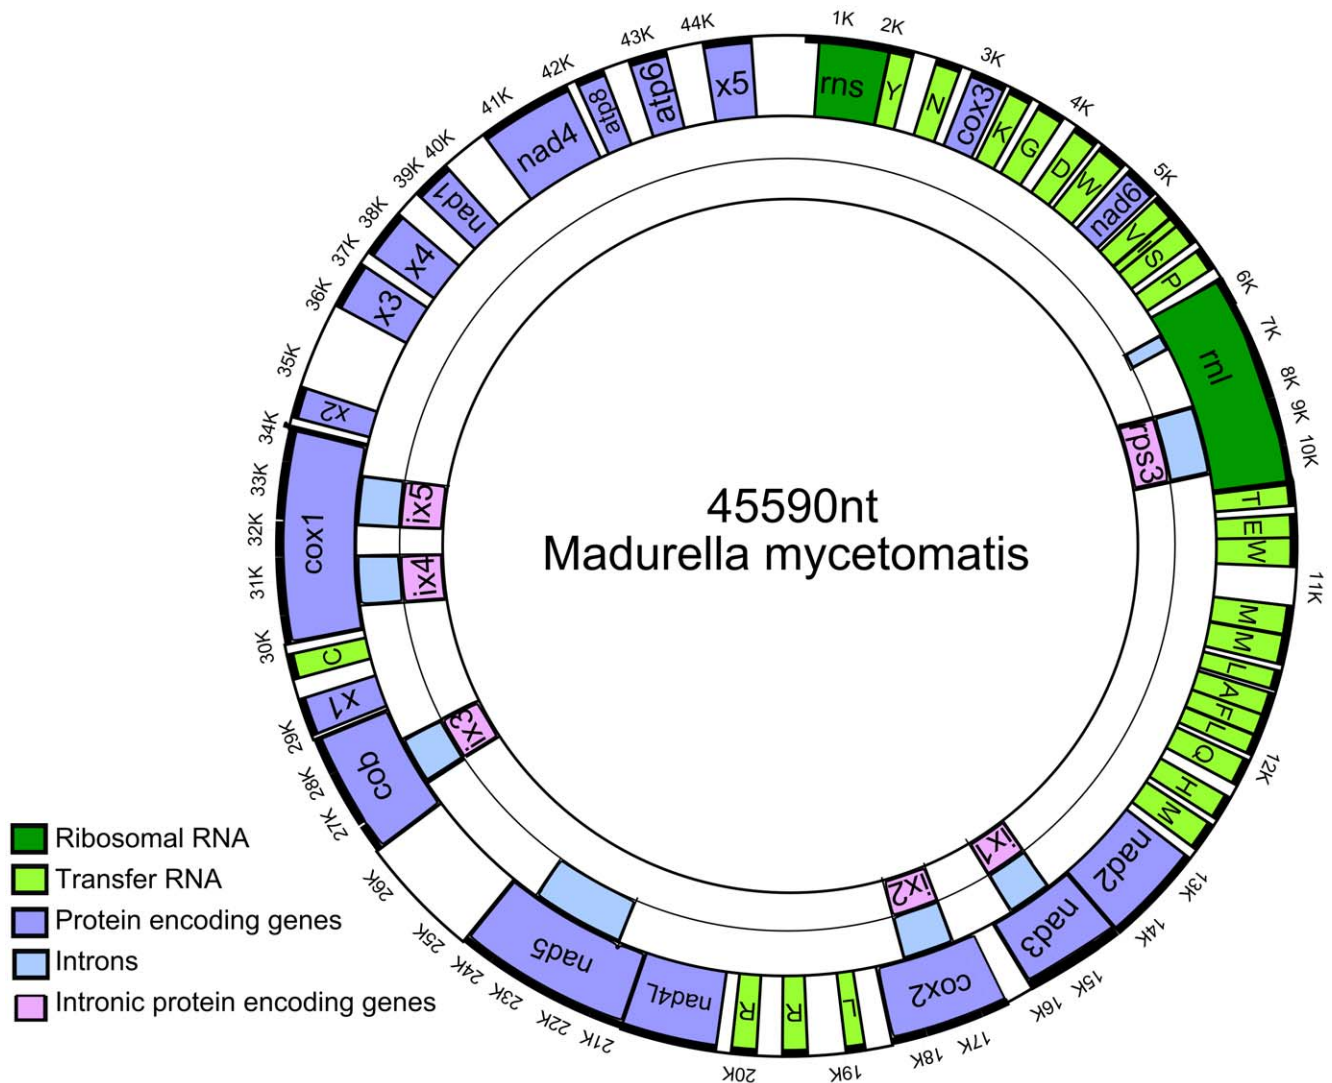

**Figure 1. Physical map of the mitochondrial genome of *M. mycetomatis*.** All genes are located on the plus-strand and are shown in the outer ring of the circle, they are transcribed counterclockwise. On the plus-strand the following genes are encountered: *rnl*, *rns*, 11 genes encoding subunits of respiratory chain complexes (*cob*, *cox1*, *cox2*, *cox3*, *nad1*, *nad2*, *nad3*, *nad4*, *nad4L*, *nad5*, and *nad6*), 2 ATP synthase subunits (*atp6* and *atp8*), 5 hypothetical proteins (*x1*, *x2*, *x3*, *x4* and *x5*) and 6 intronic proteins including the ribosomal protein *rps3* are shown. The introns are shown as blue boxes in the middle ring underneath the genes in which they are located. The intronic proteins are shown as pink boxes in the inner ring underneath the introns and the genes in which they are located. The exact starting and ending positions of each gene, intron and tRNA are shown in table 1.

doi:10.1371/journal.pone.0038654.g001

on a different, independent circular molecule, rather than in the mitochondrial genome [12,27,32]. Next to the proteins involved in respiratory chain complexes, the mitochondrial DNA encodes for 5 hypothetical proteins and 6 intronic proteins including ribosomal protein S3 (*rps3*). Of the 5 hypothetical proteins only hypothetical proteins 1 and 3 do not show any homology with other known genes. For the other hypothetical genes some homology is found at the protein level. Hypothetical protein 2 shows homology with an unnamed protein product with accession number CAA38821, found in the mitochondrion of *Podospora anserina* (e-value:  $3e-08$ , max identity 38%). Hypothetical protein 4 shows homology with YP\_003127070, a GIY-YIG endonuclease found in an intronic protein in the *cob* gene of the yeast *Dekkera bruxellensis* (e-value:  $5e-04$ , max identity 25%) [12]. Since no GIY-YIG motif is found in this hypothetical protein, it probably does not function as a GIY-YIG endonuclease. Hypothetical protein 5 shows homology with

orf296 of *P. anserina* (Accession number NP\_074917, e-value:  $2e-19$ ), UrfLM of *Neurospora intermedia* (Accession number AAU25928, e-value:  $3e-8$ ) and an unnamed protein product of *N. crassa* (Accession number CAA31721.1, e-value:  $5e-5$ ). Orf 296 is in *P. anserina* a LAGLIDADG endonuclease found in an intronic sequence after exon3 of *cox1* gene [27,33]. Hypothetical protein 5 does not show a LAGLIDADG domain in its sequence and therefore probably does not function as a LAGLIDADG endonuclease. Hypothetical proteins 4 and 5 are probably remnants of endonucleases but do not function as endonucleases any more, their precise function, if any, remains unknown.

#### Introns

In the coding genes of the mitochondrial genome of *M. mycetomatis*, a total of 8 introns are found. All introns are group I introns (table 1). Two introns are found in both the large

**Table 1.** Genome organization of *M. mycetomatis*.

| Gene | Intron         |               |             |             |             |            | Intron protein |             |             |      |                |               |             |             |             |            |
|------|----------------|---------------|-------------|-------------|-------------|------------|----------------|-------------|-------------|------|----------------|---------------|-------------|-------------|-------------|------------|
|      | Start position | Stop position | Length (nt) | Length (aa) | Start-Codon | Stop-codon | Intron Start   | Intron Stop | Intron type | Gene | Start position | Stop position | Length (nt) | Length (aa) | Start-Codon | Stop-codon |
| rns  | 267            | 2050          | 1784        |             |             |            |                |             |             |      |                |               |             |             |             |            |
| trnY | 2042           | 2128          | 87          |             |             |            |                |             |             |      |                |               |             |             |             |            |
| trnN | 2477           | 2547          | 71          |             |             |            |                |             |             |      |                |               |             |             |             |            |
| cox3 | 2721           | 3530          | 810         | 269         | ATT         | TAG        |                |             |             |      |                |               |             |             |             |            |
| trnK | 3616           | 3687          | 72          |             |             |            |                |             |             |      |                |               |             |             |             |            |
| trnG | 3825           | 3895          | 71          |             |             |            |                |             |             |      |                |               |             |             |             |            |
| trnD | 4118           | 4190          | 73          |             |             |            |                |             |             |      |                |               |             |             |             |            |
| trnW | 4283           | 4353          | 71          |             |             |            |                |             |             |      |                |               |             |             |             |            |
| nad6 | 4464           | 5129          | 666         | 221         | ATG         | TAA        |                |             |             |      |                |               |             |             |             |            |
| trnV | 5201           | 5272          | 72          |             |             |            |                |             |             |      |                |               |             |             |             |            |
| trnI | 5288           | 5359          | 72          |             |             |            |                |             |             |      |                |               |             |             |             |            |
| trnS | 5364           | 5448          | 85          |             |             |            |                |             |             |      |                |               |             |             |             |            |
| trnP | 5574           | 5648          | 75          |             |             |            |                |             |             |      |                |               |             |             |             |            |
| rnl  | 5823           | 10438         | 4616        |             |             |            | 6145           | 6271        | IA          | rps3 | 8493           | 9740          | 1248        | 415         | ATG         | TAA        |
| trnT | 10459          | 10529         | 71          |             |             |            |                |             |             |      |                |               |             |             |             |            |
| trnE | 10655          | 10735         | 81          |             |             |            |                |             |             |      |                |               |             |             |             |            |
| trnW | 10655          | 10726         | 72          |             |             |            |                |             |             |      |                |               |             |             |             |            |
| trnM | 11299          | 11371         | 73          |             |             |            |                |             |             |      |                |               |             |             |             |            |
| trnM | 11386          | 11458         | 73          |             |             |            |                |             |             |      |                |               |             |             |             |            |
| trnL | 11554          | 11638         | 85          |             |             |            |                |             |             |      |                |               |             |             |             |            |
| trnA | 11697          | 11769         | 73          |             |             |            |                |             |             |      |                |               |             |             |             |            |
| trnF | 11773          | 11845         | 73          |             |             |            |                |             |             |      |                |               |             |             |             |            |
| trnL | 11856          | 11940         | 85          |             |             |            |                |             |             |      |                |               |             |             |             |            |
| trnQ | 12029          | 12101         | 73          |             |             |            |                |             |             |      |                |               |             |             |             |            |
| trnH | 12305          | 12377         | 73          |             |             |            |                |             |             |      |                |               |             |             |             |            |
| trnM | 12482          | 12553         | 72          |             |             |            |                |             |             |      |                |               |             |             |             |            |
| nad2 | 12708          | 14390         | 1683        | 560         | ATG         | TAA        |                |             |             |      |                |               |             |             |             |            |
| nad3 | 14391          | 16094         | 1704        | 137         | ATG         | TAA        | 14480          | 15770       | IC2         | ix1  | 14391          | 15725         | 1335        | 444         | ATG         | TAA        |
| cox2 | 16436          | 18502         | 2067        | 250         | ATG         | TAG        | 16640          | 17953       | IC2         | ix2  | 16643          | 17903         | 1260        | 419         | ATG         | TAA        |
| trnL | 18894          | 18967         | 74          |             |             |            |                |             |             |      |                |               |             |             |             |            |
| trnR | 19515          | 19585         | 71          |             |             |            |                |             |             |      |                |               |             |             |             |            |
| trnR | 19957          | 20029         | 73          |             |             |            |                |             |             |      |                |               |             |             |             |            |

Table 1. Cont.

| Gene         | Intron         |               |             |             |             |            | Intron protein |             |             |            |                |               |             |             |             |            |
|--------------|----------------|---------------|-------------|-------------|-------------|------------|----------------|-------------|-------------|------------|----------------|---------------|-------------|-------------|-------------|------------|
|              | Start position | Stop position | Length (nt) | Length (aa) | Start-Codon | Stop-codon | Intron Start   | Intron Stop | Intron type | Gene       | Start position | Stop position | Length (nt) | Length (aa) | Start-Codon | Stop-codon |
| <i>nad4L</i> | 20252          | 20521         | 270         | 89          | ATG         | TAA        |                |             |             |            |                |               |             |             |             |            |
| <i>nad5</i>  | 20521          | 24611         | 4091        | 643         | ATG         | TAA        | 21452          | 23604       | IA          |            |                |               |             |             |             |            |
| <i>cob</i>   | 26392          | 28848         | 2457        | 395         | ATG         | TAA        | 26788          | 28053       | ID          | <i>ix3</i> | 26761          | 27690         | 930         | 309         | ATG         | TAG        |
| <i>x1</i>    | 28913          | 29464         | 552         | 183         | ATG         | TAG        |                |             |             |            |                |               |             |             |             |            |
| <i>trnC</i>  | 29762          | 29832         | 71          |             |             |            |                |             |             |            |                |               |             |             |             |            |
| <i>cox1</i>  | 29979          | 34122         | 4144        | 566         | ATG         | TAG        | 30367          | 31514       | IB          | <i>ix4</i> | 30418          | 31407         | 990         | 329         | ATG         | TAA        |
|              |                |               |             |             |             |            | 32189          | 33478       | IB          | <i>ix5</i> | 32167          | 33465         | 1299        | 432         | ATG         | TAA        |
| <i>x2</i>    | 34251          | 34715         | 465         | 154         | ATG         | TAA        |                |             |             |            |                |               |             |             |             |            |
| <i>x3</i>    | 34968          | 35975         | 1008        | 335         | ATG         | TAA        |                |             |             |            |                |               |             |             |             |            |
| <i>x4</i>    | 37164          | 38372         | 1209        | 402         | ATT         | TAA        |                |             |             |            |                |               |             |             |             |            |
| <i>nad1</i>  | 38765          | 39880         | 1116        | 371         | ATG         | TAA        |                |             |             |            |                |               |             |             |             |            |
| <i>nad4</i>  | 40576          | 42006         | 1431        | 476         | ATG         | TAA        |                |             |             |            |                |               |             |             |             |            |
| <i>atp8</i>  | 42159          | 42311         | 153         | 50          | ATG         | TAA        |                |             |             |            |                |               |             |             |             |            |
| <i>atp6</i>  | 42703          | 43491         | 789         | 262         | ATG         | TAA        |                |             |             |            |                |               |             |             |             |            |
| <i>x5</i>    | 44033          | 44881         | 849         | 282         | ATG         | TAA        |                |             |             |            |                |               |             |             |             |            |

Genomic organization of the mitochondrial genome of *Madurella mycetomatis*. In this table the start and stop positions and the lengths of the resulting nucleotide and amino acid sequences are shown for all genes, tRNAs, introns and intronic proteins. For the introns the group and subgroups are also stated. The classification of these introns are based on the conservation of the core sequences and structural motifs as indicated by Michel et al. [48]. doi:10.1371/journal.pone.0038654.t001

**Table 2.** Codon usage in protein coding genes of *M. mycetomatis* mitochondrial genome.

| AA | codon | %    | AA | codon | %    | AA | codon | %    | AA   | Codon | %    |
|----|-------|------|----|-------|------|----|-------|------|------|-------|------|
| A  | GCG   | 0.22 | H  | CAU   | 1.31 | P  | CCG   | 0.09 | S    | UCU   | 3.11 |
| A  | GCA   | 1.46 | H  | CAC   | 0.36 | P  | CCA   | 0.64 | S    | UCC   | 0.26 |
| A  | GCU   | 2.43 | I  | AUA   | 6.07 | P  | CCU   | 2.48 | T    | ACG   | 0.15 |
| A  | GCC   | 0.26 | I  | AUU   | 4.23 | P  | CCC   | 0.10 | T    | ACA   | 2.11 |
| C  | UGU   | 0.61 | I  | AUC   | 0.56 | Q  | CAG   | 0.22 | T    | ACU   | 2.73 |
| C  | UGC   | 0.10 | K  | AAG   | 0.75 | Q  | CAA   | 1.90 | T    | ACC   | 0.16 |
| D  | GAU   | 2.92 | K  | AAA   | 5.17 | R  | AGG   | 0.07 | V    | GUG   | 0.44 |
| D  | GAC   | 0.45 | L  | UUG   | 0.85 | R  | AGA   | 2.23 | V    | GUA   | 2.78 |
| E  | GAG   | 0.82 | L  | UUA   | 9.04 | R  | CGG   | 0.06 | V    | GUU   | 2.16 |
| E  | GAA   | 3.38 | L  | CUG   | 0.26 | R  | CGA   | 0.11 | V    | GUC   | 0.17 |
| F  | UUU   | 5.41 | L  | CUA   | 1.01 | R  | CGU   | 0.42 | W    | UGG   | 0.14 |
| F  | UUC   | 1.44 | L  | CUU   | 1.46 | R  | CGC   | 0.02 | W    | UGA   | 1.11 |
| G  | GGG   | 0.50 | L  | CUC   | 0.11 | S  | AGU   | 3.31 | Y    | UAU   | 4.36 |
| G  | GGA   | 2.08 | M  | AUG   | 2.10 | S  | AGC   | 0.44 | Y    | UAC   | 0.75 |
| G  | GGU   | 3.22 | N  | AAU   | 5.68 | S  | UCG   | 0.15 | Stop | UAG   | 0.06 |
| G  | GGC   | 0.11 | N  | AAC   | 0.84 | S  | UCA   | 1.79 | Stop | UAA   | 0.23 |

The percentage codon used in the protein encoding regions of *atp6*, *atp8*, *cob*, *cox1*, *cox2*, *cox3*, *nad1*, *nad2*, *nad3*, *nad4*, *nad4L*, *nad5*, *nad6*, hypothetical protein 1, hypothetical protein 2, hypothetical protein 3, hypothetical protein 4, hypothetical protein 5, *rps3*, intron protein 1, intron protein 2, intron protein 3, intron protein 4 and intron protein 5 is depicted.

doi:10.1371/journal.pone.0038654.t002

ribosomal subunit (intron IA) and in *cox1* (both intron IB). Single introns are found in *cob* (intron ID), *cox2* (intron IC2), *nad3* (intron IC2) and *nad5* (intron IA) (table 1). Group I introns are considered to be mobile genetic elements which interrupt protein-coding and structural RNA genes [34]. One of the features of group I introns is that they themselves are often invaded with smaller genes that encode mobility-promoting activities that enables the DNA element to move within and between genomes, usually so-called homing endonucleases [34]. In the *M. mycetomatis* mitochondrial DNA we find five intronic proteins, located in the introns of *cob*, *cox1* (in each intron one), *cox2* and *nad3* which encode for such homing endonucleases and one intronic protein which encode for ribosomal protein S3 (*rps3*). Of the four families of homing endonuclease proteins only endonucleases with the conserved amino acid sequence motifs LAGLIDADG (intron proteins 1, 2, and 4) and GIY-YIG (intron proteins 3 and 5) are found. The endonuclease assignment was supported by BLAST analysis and

motif identification using PFAM. LAGLIDADG homing endonucleases are found in two forms: a single LAGLIDADG motif that dimerizes and double-motif forms derived from a gene fusion event between two monomeric forms [35]. The endonucleases found in the *M. mycetomatis* mitochondrial genome are all with double-motif forms.

### Intergenic Regions

The presence of putative mitochondrial promoters are detected by comparison of the only promoter from the Sordariales, the *Neurospora crassa* sequence TTAG(A/T)RR(G/T)(G/C)N(A/T) [11,36,37]. Two putative promoter sequences are located within the intergenic regions and close to the 5' end of coding genes, namely TTAGAATCTT (15885–15896) and TTAGTGGTCTA (36265–36276). Putative promoter sequence TTAGAATCTT is located 551 bp for the 5' end of *cox2*, while putative promoter sequence TTAGAATCTT is located 899 bp for hypothetical protein 4. Both putative promoter sequences are preceded by a 15–23 bp long AT-rich region, as is also described for other fungal species, thus strengthening the hypothesis that these sequences may indeed be mitochondrial promoters [11,37].

### Genetic Code and Codon Usage

Using the genetic mould mitochondrial code from NCBI (translation table 4), the codon usage of the *M. mycetomatis* mitochondrial ORFs is determined. Of the 23 ORFs, only the *cox3* and hypothetical protein 3 starts with the ATT initiation codon, all other genes start with the ATG initiation codon (table 1). Most of the ORF end with the in preferred TAA stop-codon, only 5 ORFs (*cox1*, *cox2*, *cox3*, hypothetical protein 1 and intronprotein 3) end with the TAG stop-codon [38]. As is also found for other fungi, the most frequently used amino acid in the 23 protein genes is leucine followed by isoleucine (table 2) [11]. As seen in table 2, the codon usage in *M. mycetomatis* mitochondrial ORFs shows a strong bias towards codons ending with a U or A since 86.8% of

**Table 3.** tRNAs identified in the genome of *M. mycetomatis*.

| AA | Anti-codon | AA | Anti-codon | AA | Anti-codon | AA | Anti-codon |
|----|------------|----|------------|----|------------|----|------------|
| A  | UGC        | I  | GAU        | P  | UGG        | W  | UCA*       |
| C  | GCA        | K  | UUU        | Q  | UUC        | Y  | GUA        |
| D  | GUC        | L  | AAG        | R  | ACG        |    |            |
| E  | UUG        | L  | UAA        | R  | UCU        |    |            |
| F  | GAA        | L  | UAG*       | S  | UGA        |    |            |
| G  | UCC        | M  | CAU**      | T  | UGU        |    |            |
| H  | GUG        | N  | GUU        | V  | UAC        |    |            |

\*two tRNAs with the same anticodon were found.

\*\*three tRNAs with the same anticodon were found.

doi:10.1371/journal.pone.0038654.t003

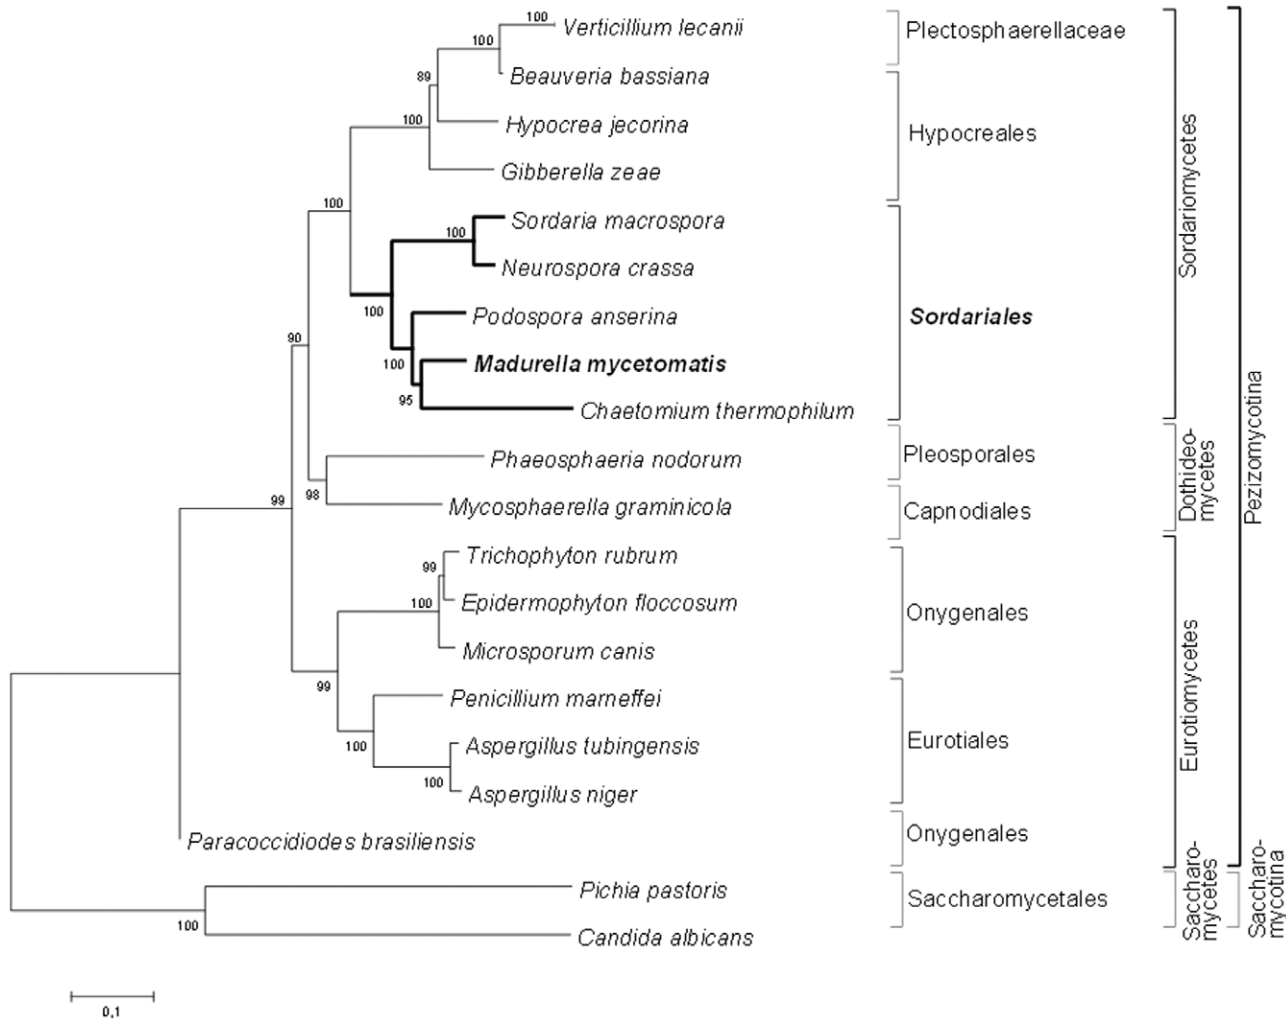

**Figure 2. Maximum likelihood phylogenetic tree based on amino acid sequences of conserved mitochondrial proteins of various fungal species.** Amino acid sequences of the genes *atp6*, *atp8*, *atp9*, *cob*, *cox1*, *cox2*, *cox3*, *nad1*, *nad2*, *nad3*, *nad4*, *nad4L*, *nad5* and *nad6* were used to construct this tree using the maximum likelihood algorithm of MEGA 5.05. Bootstrap support was calculated from 1000 replicates using the same program. GenBank sequences used were: *V. lecanii* (NC\_004514), *B. bassiana* (NC\_010652), *H. jecorina* (NC\_NC003388), *G. zeae* (NC\_009493), *S. macrospora* (CABT01004783), *P. anserina* (NC\_001329), *C. thermophilum* (NC\_015893), *P. nodorum* (NC\_009746), *T. rubrum* (NC\_012824), *E. floccosum* (NC\_007394), *M. canis* (NC\_012832), *P. marneffeii* (NC\_005256), *A. tubingensis* (NC\_007597), *A. niger* (NC\_007445), *P. brasiliensis* (NC\_007935), *P. pastoris* (NC\_015384), *C. albicans* (NC\_002653). Protein sequences of *N. crassa* mtDNA was downloaded from supercontig 10.21 from the Broad institute. doi:10.1371/journal.pone.0038654.g002

the codons ends with these bases. The tendency for the A and U residues in the wobble position has also been observed in other fungal genomes [12,39,40,41,42]. As expected due to the high AU content of the mitochondrial genome, the preference of A and U residues is also noted in the overall codon use. The most frequently used codons consist only of Us and As and were UUA (9.04%), AUA (6.07%), AAU (5.68%), UUU (5.41%), AAA (5.17%), UAU (4.36%) and AUU (4.23%) (table 2). The least frequently used codons, CGC (0.02%), CGG (0.06%), CGG (0.06%), AGG (0.07%) and CCC (0.10%), are the codons which consist mainly of Cs and Gs (table 2).

### tRNAs

In the *M. mycetomatis* mitochondrial genome 27 tRNAs are identified which clustered roughly in three groups (figure 1). Among the tRNAs all amino-acids are accounted for, but for some amino-acids multiple tRNAs are found (table 3). There are two tRNAs with different anticodons for arginine, four tRNAs with

three different anticodons for leucine, three tRNAs with the same anticodon for methionine and two tRNAs with the same anticodon for tryptophane. All tRNAs have a cloverleaf structure except the tyrosine tRNA and the leucine tRNA with anticodon AAG, they have a TV-loop and D-loop structure respectively.

### Phylogeny and Comparative Genomics

With the exception of the group of yeast that are lacking NADH genes, all other fungal mtDNAs contain the same essential functional genes [11]. Therefore, the sequences of these 14 conserved protein encoding genes, as well as the mitochondrial organization of these genes can be used to determine the relations between different fungal species. Amino acid sequence of 14 protein coding genes in the mitochondrial genomes of *M. mycetomatis* and 20 other fungi are used for phylogenetic tree construction (figure 2). Most nodes in this tree have high bootstrap values which indicate the robustness of the tree computed. As found by others, the mitochondrial genomes of

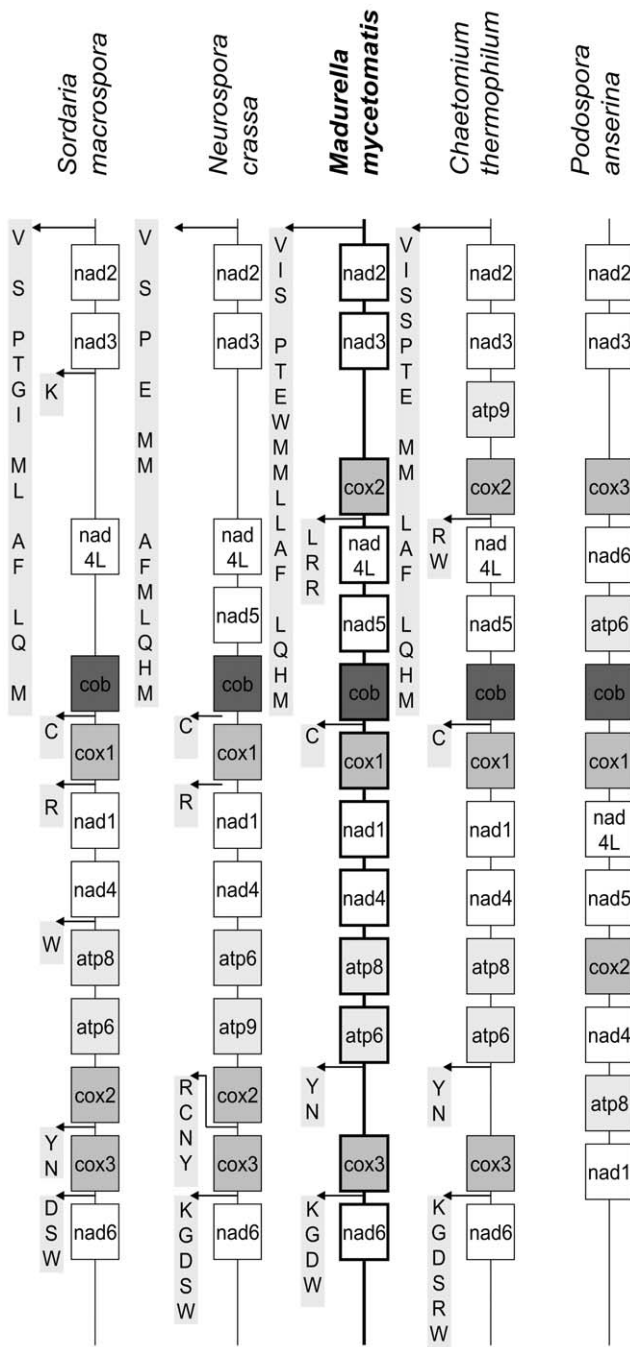

**Figure 3. Mitochondrial gene order of 5 members of the order Sordariales.** The gene order of the protein-encoding genes, *atp6*, *atp8*, *atp9*, *cob*, *cox1*, *cox2*, *cox3*, *nad1*, *nad2*, *nad3*, *nad4*, *nad4L*, *nad5* and *nad6* are shown for *S. macrospora*, *N. crassa*, *M. mycetomatis*, *C. thermophilum* and *P. anserina*. For the first four species, the positions of the tRNA genes are also depicted by using their one letter amino acid code.  
doi:10.1371/journal.pone.0038654.g003

the yeast species cluster apart from the mitochondrial genomes obtained from filamentous fungi [10]. As is seen in figure 2, *M. mycetomatis* clusters amongst other species of the order Sordariales with high bootstrap support. Placing *M. mycetomatis* in the order Sordariales is in line with previous observations based on the nuclear sequences SSU, ITS, betatubulin 2 and ribosomal binding

protein 2 [3,4]. Based on an extensive phylogenetic comparison of the SSU rDNA sequence of *M. mycetomatis* with that of 157 other members of the Ascomycota belonging to the orders Chaetothyr-iales, Diaporthales, Dothideales, Eurotiales, Halosphaeriales, Hypocreales, Lecanorales, Leotiales, Microascales, Onygenales, Ophiostomatales, Pezizales, Pleosporales, Sordariales, Taphrinales and Tuberales it appeared that *M. mycetomatis* clustered among the members of the order Sordariales while *M. grisea* clustered among the members of the order Pleosporales [3]. In order to determine the phylogenetic place of *M. mycetomatis* within the order Sordariales, the ITS, betatubulin 2 and ribosomal binding protein 2 were also sequenced and compared to 39 members of the order Sordariales. In this latter study it appeared that *M. mycetomatis* was most closely related to *M. tropicana*, *M. pseudomycetomatis* and *M. fahalli*, but that the genus *Madurella* itself was most closely related to the genus *Chaetomium* [4]. This close relatedness to the genus *Chaetomium* is confirmed in this study. Based on the phylogenetic comparisons made with the mitochondrial sequence, it appears that the closest relative of *M. mycetomatis* is *C. thermophilum*.

The relatedness amongst the order Sordariales is further studied by comparing the mitochondrial organization of *M. mycetomatis* to the 4 complete fungal mtDNA sequences belonging to the order Sordariales. Comparable to the high similarity in amino-acid sequence and the uniform mtDNA genome organization found for dermatophytes belonging to the order Onygenales [10], the mitochondrial genome organization found for the order Sordariales is apparently also uniform (figure 3). The only exception is the mitochondrial genome organization of *P. anserina*, which differs from the genome organization of the other members of the order Sordariales (figure 3). This marked difference has been noted in the past, and led to the conclusion that the mitochondrial gene order in the order Sordariales was apparently quite diverse [11]. Here it is shown, that for most mitochondrial genomes in the order Sordariales this is not the case. More mitochondrial genomes are needed for the order Sordariales to determine if the gene order is indeed similar and that *P. anserina* is the exception, or that the gene orders are in overall more diverse within this order. When comparing the different genome organizations it appears that the genome organization of *M. mycetomatis* is most closely related to that of *C. thermophilum* (figures 3), which only differed in the presence of the gene *atp9* between *nad3* and *cox2* in *C. thermophilum* and its absence in *M. mycetomatis*. Next to having the same gene order, the tRNA clustering in the order Sordariales is similar. Again the tRNA order of *M. mycetomatis* resembles that of *C. thermophilum* the most (figure 3). Combining the phylogenetic data, the gene order and the tRNA order it appears that the mitochondrial genome of *M. mycetomatis* is most closely related to the mitochondrial genome of *C. thermophilum*. Fungi belonging to the order Sordariales are mostly soil-, wood- and dung-inhabiting fungi [43]. *N. crassa* is usually found in or on burned vegetation and the soil, while the natural habitat of *S. macrospora*, *P. anserina* and *C. thermophilum*, is mainly the soil and herbivore dung [15,44,45,46]. Although DNA of *M. mycetomatis* has been shown to be present in soil and on thorns in the endemic area, nobody has been able to culture *M. mycetomatis* directly from these niches [47]. Therefore the natural habitat of *M. mycetomatis* still needs to be confirmed. Based on this and other studies, it is demonstrated that *M. mycetomatis* clusters within the order Sordariales, therefore the natural habitat of *M. mycetomatis* might be sought on similar substrates. To discover the natural niche of this fungus could lead to strategies in the prevention of this mutilating disease.



## Conclusion

Comparative genomics provides a powerful tool for uncovering similarities and differences between species and placing them in their correct order. In order to gain insight in the evolutionary place of *M. mycetomatis* in the fungal kingdom, previous studies have used the nuclear ribosomal internal transcribed spacers (ITS) which showed that *M. mycetomatis* clusters amidst the order Sordariales. Here the complete mitochondrial genome of *M. mycetomatis* is reported. The composition and organization of the genes within this mtDNA are found to cluster amongst the

Sordariales, and is found to be almost identical to that of *C. thermophilum*. Phylogenetic analyses of the whole protein-encoding gene content of *M. mycetomatis* confirm its position in the order of the Sordariales with *C. thermophilum* as its closest relative.

## Author Contributions

Conceived and designed the experiments: WvdS. Performed the experiments: WvdS. Analyzed the data: WvdS. Contributed reagents/materials/analysis tools: WvdS. Wrote the paper: WvdS.

## References

- Ahmed AO, van Leeuwen W, Fahal A, van de Sande WWJ, Verbrugh H, et al. (2004) Mycetoma caused by *Madurella mycetomatis*: a neglected infectious burden. *Lancet Infect Dis* 4: 566–574.
- van de Sande WWJ, Fahal AH, de Hoog GS, Van Belkum A (2011) *Madurella*. In: Liu D, ed. Molecular detection of human fungal pathogens. Boca Raton: CRC Press, Taylor & Francis Group. pp 117–128.
- de Hoog GS, Adelmann D, Ahmed AO, van Belkum A (2004) Phylogeny and typification of *Madurella mycetomatis*, with a comparison of other agents of eumycetoma. *Mycoses* 47: 121–130.
- de Hoog GS, van Diepeningen AD, Mahgoub el S, van de Sande WW (2012) New species of madurella, causative agents of black-grain mycetoma. *J Clin Microbiol* 50: 988–994.
- Bullerwell CE, Lang BF (2005) Fungal evolution: the case of the vanishing mitochondrion. *Curr Opin Microbiol* 8: 362–369.
- Lang BF, Gray MW, Burger G (1999) Mitochondrial genome evolution and the origin of eukaryotes. *Annu Rev Genet* 33: 351–397.
- Ballard JW, Whitlock MC (2004) The incomplete natural history of mitochondria. *Mol Ecol* 13: 729–744.
- Basse CW (2010) Mitochondrial inheritance in fungi. *Curr Opin Microbiol* 13: 712–719.
- van Diepeningen AD, Goedbloed DJ, Slakhorst SM, Koopmanschap AB, Maas MF, et al. (2010) Mitochondrial recombination increases with age in *Podospora anserina*. *Mech Ageing Dev* 131: 315–322.
- Wu Y, Yang J, Yang F, Liu T, Leng W, et al. (2009) Recent dermatophyte divergence revealed by comparative and phylogenetic analysis of mitochondrial genomes. *BMC Genomics* 10: 238.
- Kouvelis VN, Ghikas DV, Typas MA (2004) The analysis of the complete mitochondrial genome of *Lecanicillium muscarium* (synonym *Verticillium lecanii*) suggests a minimum common gene organization in mtDNAs of Sordariomycetes: phylogenetic implications. *Fungal Genet Biol* 41: 930–940.
- Prochazka E, Polakova S, Piskur J, Sulo P (2010) Mitochondrial genome from the facultative anaerobe and petite-positive yeast *Dekkera bruxellensis* contains the NADH dehydrogenase subunit genes. *FEMS Yeast Res* 10: 545–557.
- Cardoso MA, Tambor JH, Nobrega FG (2007) The mitochondrial genome from the thermal dimorphic fungus *Paracoccidioides brasiliensis*. *Yeast* 24: 607–616.
- Amlacher S, Sarges P, Flemming D, van Noort V, Kunze R, et al. (2011) Insight into structure and assembly of the nuclear pore complex by utilizing the genome of a eukaryotic thermophile. *Cell* 146: 277–289.
- Nowrousian M, Stajich JE, Chu M, Engh I, Espagne E, et al. (2010) De novo assembly of a 40 Mb eukaryotic genome from short sequence reads: *Sordaria macrospora*, a model organism for fungal morphogenesis. *PLoS Genet* 6: e1000891.
- Ahmed AO, Mukhtar MM, Kools-Sijmons M, Fahal AH, de Hoog S, et al. (1999) Development of a species-specific PCR-restriction fragment length polymorphism analysis procedure for identification of *Madurella mycetomatis*. *J Clin Microbiol* 37: 3175–3178.
- van de Sande WWJ, Luijendijk A, Ahmed AO, Bakker-Woudenberg IA, van Belkum A (2005) Testing of the in vitro susceptibilities of *Madurella mycetomatis* to six antifungal agents by using the sensitive system in comparison with a viability-based 2,3-bis(2-methoxy-4-nitro-5-sulfophenyl)-5-[(phenylamino)carbonyl]-2H-tetrazolium hydroxide (XTT) assay and a modified NCCLS method. *Antimicrob Agents Chemother* 49: 1364–1368.
- Ahmed AO, van de Sande WWJ, van Vianen W, van Belkum A, Fahal AH, et al. (2004) In vitro susceptibilities of *Madurella mycetomatis* to itraconazole and amphotericin B assessed by a modified NCCLS method and a viability-based 2,3-bis(2-methoxy-4-nitro-5-sulfophenyl)-5-[(phenylamino)carbonyl]-2H-tetrazolium hydroxide (XTT) assay. *Antimicrob Agents Chemother* 48: 2742–2746.
- Ahmed A, van de Sande W, Verbrugh H, Fahal A, van Belkum A (2003) *Madurella mycetomatis* strains from mycetoma lesions in Sudanese patients are clonal. *J Clin Microbiol* 41: 4537–4541.
- Ahmed AO, van Vianen W, ten Kate MT, van de Sande WW, van Belkum A, et al. (2003) A murine model of *Madurella mycetomatis* eumycetoma. *FEMS Immunol Med Microbiol* 37: 29–36.
- Lowe TM, Eddy SR (1997) tRNAscan-SE: a program for improved detection of transfer RNA genes in genomic sequence. *Nucleic Acids Res* 25: 955–964.
- Schattner P, Brooks AN, Lowe TM (2005) The tRNAscan-SE, snoscan and snoGPS web servers for the detection of tRNAs and snoRNAs. *Nucleic Acids Res* 33: W686–689.
- Laslett D, Canback B (2004) ARAGORN, a program to detect tRNA genes and tmRNA genes in nucleotide sequences. *Nucleic Acids Res* 32: 11–16.
- Laslett D, Canback B (2008) ARWEN: a program to detect tRNA genes in metazoan mitochondrial nucleotide sequences. *Bioinformatics* 24: 172–175.
- Gautheret D, Lambert A (2001) Direct RNA motif definition and identification from multiple sequence alignments using secondary structure profiles. *J Mol Biol* 313: 1003–1011.
- Tamura K, Peterson D, Peterson N, Stecher G, Nei M, et al. (2011) MEGA5: Molecular Evolutionary Genetics Analysis using maximum likelihood, evolutionary distance, and maximum parsimony methods. *Mol Biol Evol* 28: 2731–2739.
- Cummings DJ, McNally KL, Domenico JM, Matsuura ET (1990) The complete DNA sequence of the mitochondrial genome of *Podospora anserina*. *Curr Genet* 17: 375–402.
- Collins RA, Lambowitz AM (1983) Structural variations and optional introns in the mitochondrial DNAs of *Neurospora* strains isolated from nature. *Plasmid* 9: 53–70.
- Taylor JW, Smolich BD (1985) Molecular cloning and physical mapping of the *Neurospora crassa* 74-OR23-1A mitochondrial genome. *Curr Genet* 9: 597–603.
- Woo PC, Zhen H, Cai JJ, Yu J, Lau SK, et al. (2003) The mitochondrial genome of the thermal dimorphic fungus *Penicillium marneffii* is more closely related to those of molds than yeasts. *FEBS Lett* 555: 469–477.
- Torriani SF, Goodwin SB, Kema GH, Pangilinan JL, McDonald BA (2008) Intraspecific comparison and annotation of two complete mitochondrial genome sequences from the plant pathogenic fungus *Mycosphaerella graminicola*. *Fungal Genet Biol* 45: 628–637.
- Laforest MJ, Roewer I, Lang BF (1997) Mitochondrial tRNAs in the lower fungus *Spizellomyces punctatus*: tRNA editing and UAG ‘stop’ codons recognized as leucine. *Nucleic Acids Res* 25: 626–632.
- Cummings DJ, MacNeil IA, Domenico J, Matsuura ET (1985) Excision-amplification of mitochondrial DNA during senescence in *Podospora anserina*. DNA sequence analysis of three unique ‘plasmids’. *J Mol Biol* 185: 659–680.
- Edgell DR, Chalamcharla VR, Belfort M (2011) Learning to live together: mutualism between self-splicing introns and their hosts. *BMC Biol* 9: 22.
- Sethuraman J, Majer A, Friedrich NC, Edgell DR, Hausner G (2009) Genes within genes: multiple LAGLIDADG homing endonucleases target the ribosomal protein S3 gene encoded within an rnl group I intron of *Ophiostoma* and related taxa. *Mol Biol Evol* 26: 2299–2315.
- Kleidon J, Plesofsky N, Brambl R (2003) Transcripts and transcript-binding proteins in mitochondria of *Neurospora crassa*. *Mitochondrion* 2: 345–360.
- Kubelik AR, Kennell JC, Akins RA, Lambowitz AM (1990) Identification of *Neurospora* mitochondrial promoters and analysis of synthesis of the mitochondrial small rRNA in wild-type and the promoter mutant [poky]. *J Biol Chem* 265: 4515–4526.
- Paquin B, Lang BF (1996) The mitochondrial DNA of *Allomyces macrogynus*: the complete genomic sequence from an ancestral fungus. *J Mol Biol* 255: 688–701.
- Sekito T, Okamoto K, Kitano H, Yoshida K (1995) The complete mitochondrial DNA sequence of *Hansenula wingei* reveals new characteristics of yeast mitochondria. *Curr Genet* 28: 39–53.
- Foury F, Roganti T, Lecrenier N, Purnelle B (1998) The complete sequence of the mitochondrial genome of *Saccharomyces cerevisiae*. *FEBS Lett* 440: 325–331.
- Pramateftaki PV, Kouvelis VN, Lanaridis P, Typas MA (2006) The mitochondrial genome of the wine yeast *Hanseniaspora uvarum*: a unique genome organization among yeast/fungal counterparts. *FEMS Yeast Res* 6: 77–90.
- Pramateftaki PV, Kouvelis VN, Lanaridis P, Typas MA (2008) Complete mitochondrial genome sequence of the wine yeast *Candida zemplinina*: intraspecific distribution of a novel group-IIB1 intron with eubacterial affiliations. *FEMS Yeast Res* 8: 311–327.

43. Zhang N, Castlebury LA, Miller AN, Huhndorf SM, Schoch CL, et al. (2006) An overview of the systematics of the Sordariomycetes based on a four-gene phylogeny. *Mycologia* 98: 1076–1087.
44. Jacobson DJ, Dettman JR, Adams RI, Boesl C, Sultana S, et al. (2006) New findings of *Neurospora* in Europe and comparisons of diversity in temperate climates on continental scales. *Mycologia* 98: 550–559.
45. Siliker ME, Cummings DJ (1990) Genetic and molecular analysis of a long-lived strain of *Podospora anserina*. *Genetics* 125: 775–781.
46. Paoletti M, Saupé SJ (2008) The genome sequence of *Podospora anserina*, a classic model fungus. *Genome Biol* 9: 223.
47. Ahmed A, Adelman D, Fahal A, Verbrugh H, van Belkum A, et al. (2002) Environmental occurrence of *Madurella mycetomatis*, the major agent of human eumycetoma in Sudan. *J Clin Microbiol* 40: 1031–1036.
48. Michel F, Westhof E (1990) Modelling of the three-dimensional architecture of group I catalytic introns based on comparative sequence analysis. *J Mol Biol* 216: 585–610.
